# Supplementary material for: Put the control back in the control condition: are brown, pink, and white noise neutral control stimuli?
Source: Frontiers journal article supplement (doi:10.3389/fnins.2025.1488682), 2025-04-25
Supplement: Table_1.docx [file Table_1.docx]

**Supplementary materials**

Table 1. Genova emotional music scale–9 Norwegian and English translation

|  | Norwegian GEMS-9 | English GEMS-9 |
| --- | --- | --- |
| Sublime factors | Undring | Wonder |
| Sublim | Overskridelse | Transcendence |
|  | Ømhet | Tenderness |
|  | Nostalgia | Nostalgia |
|  | Fredfylt | Peacefulness |
| Vital factors | Energisk | Power |
| Vital | Glede | Joyful activation |
| Uneasy factors | Anspent | Tension |
| Uroende | Sørgmodig | Sadness |

Brown noise was downloaded from this link:

[**https://www.youtube.com/watch?v=nRDaoaCfKkc&t=267s**](https://www.youtube.com/watch?v=nRDaoaCfKkc&t=267s)

Pink noise was downloaded from this link:

[**https://www.youtube.com/watch?v=ZEX9KkrZG0s&t=20s**](https://www.youtube.com/watch?v=ZEX9KkrZG0s&t=20s)

White noise was downloaded from this link:

[**https://www.youtube.com/watch?v=Fa7tG7WpvUo&t=311s**](https://www.youtube.com/watch?v=Fa7tG7WpvUo&t=311s)

Table 2. Shapiro-wilks analysis of normality

| Stimuli | Statistic | df | Sig. |
| --- | --- | --- | --- |
| BROWN_wonder | .738 | 64 | <.001 |
| BROWN_transendence | .674 | 64 | <.001 |
| BROWN_tenderness | .556 | 64 | <.001 |
| BROWN_nostalgia | .832 | 64 | <.001 |
| BROWN_peacefullness | .891 | 64 | <.001 |
| BROWN_power | .675 | 64 | <.001 |
| BROWN_joyful activation | .752 | 64 | <.001 |
| BROWN_tension | .698 | 64 | <.001 |
| BROWN_sadness | .555 | 64 | <.001 |
| PINK_wonder | .711 | 64 | <.001 |
| PINK_transendence | .720 | 64 | <.001 |
| PINK_tenderness | .566 | 64 | <.001 |
| PINK_nostalgia | .832 | 64 | <.001 |
| PINK_peacefullness | .816 | 64 | <.001 |
| PINK_power | .826 | 64 | <.001 |
| PINK_joyful activation | .757 | 64 | <.001 |
| PINK_tension | .859 | 64 | <.001 |
| PINK_sadness | .583 | 64 | <.001 |
| WHITE_wonder | .473 | 64 | <.001 |
| WHITE_transendence | .419 | 64 | <.001 |
| WHITE_tenderness | .332 | 64 | <.001 |
| WHITE_nostalgia | .582 | 64 | <.001 |
| WHITE_peacefullness | .608 | 64 | <.001 |
| WHITE_power | .715 | 64 | <.001 |
| WHITE_joyful activation | .479 | 64 | <.001 |
| WHITE_tension | .897 | 64 | <.001 |
| WHITE_sadness | .454 | 64 | <.001 |
| V1_F_wonder | .552 | 64 | <.001 |
| V1_F_transendence | .493 | 64 | <.001 |
| V1_F_tenderness | .506 | 64 | <.001 |
| V1_F_nostalgia | .527 | 64 | <.001 |
| V1_F_peacefullness | .767 | 64 | <.001 |
| V1_F_power | .812 | 64 | <.001 |
| V1_F_joyful activation | .722 | 64 | <.001 |
| V1_F_tension | .822 | 64 | <.001 |
| V1_F_sadness | .434 | 64 | <.001 |
| V1_M_wonder | .555 | 64 | <.001 |
| V1_M_transendence | .466 | 64 | <.001 |
| V1_M_tenderness | .439 | 64 | <.001 |
| V1_M_nostalgia | .506 | 64 | <.001 |
| V1_M_peacefullness | .792 | 64 | <.001 |
| V1_M_power | .716 | 64 | <.001 |
| V1_M_joyful activation | .551 | 64 | <.001 |
| V1_M_tension | .767 | 64 | <.001 |
| V1_M_sadness | .479 | 64 | <.001 |
| V2_F_wonder | .501 | 64 | <.001 |
| V2_F_transendence | .472 | 64 | <.001 |
| V2_F_tenderness | .564 | 64 | <.001 |
| V2_F_nostalgia | .523 | 64 | <.001 |
| V2_F_peacefullness | .769 | 64 | <.001 |
| V2_F_power | .710 | 64 | <.001 |
| V2_F_joyful activation | .651 | 64 | <.001 |
| V2_F_tension | .832 | 64 | <.001 |
| V2_F_sadness | .492 | 64 | <.001 |
| V2_M_wonder | .531 | 64 | <.001 |
| V2_M_transendence | .525 | 64 | <.001 |
| V2_M_tenderness | .544 | 64 | <.001 |
| V2_M_nostalgia | .565 | 64 | <.001 |
| V2_M_peacefullness | .803 | 64 | <.001 |
| V2_M_power | .660 | 64 | <.001 |
| V2_M_joyful activation | .586 | 64 | <.001 |
| V2_M_tension | .775 | 64 | <.001 |
| V2_M_sadness | .504 | 64 | <.001 |
| V3_F_wonder | .466 | 64 | <.001 |
| V3_F_transendence | .451 | 64 | <.001 |
| V3_F_tenderness | .492 | 64 | <.001 |
| V3_F_nostalgia | .506 | 64 | <.001 |
| V3_F_peacefullness | .761 | 64 | <.001 |
| V3_F_power | .774 | 64 | <.001 |
| V3_F_joyful activation | .678 | 64 | <.001 |
| V3_F_tension | .849 | 64 | <.001 |
| V3_F_sadness | .584 | 64 | <.001 |
| V3_M_wonder | .599 | 64 | <.001 |
| V3_M_transendence | .483 | 64 | <.001 |
| V3_M_tenderness | .409 | 64 | <.001 |
| V3_M_nostalgia | .568 | 64 | <.001 |
| V3_M_peacefullness | .797 | 64 | <.001 |
| V3_M_power | .620 | 64 | <.001 |
| V3_M_joyful activation | .624 | 64 | <.001 |
| V3_M_tension | .793 | 64 | <.001 |
| V3_M_sadness | .668 | 64 | <.001 |

Table 3. Shapiro-wilks analysis of normality study 2

|  | statistic | df | Sig. |
| --- | --- | --- | --- |
| Total_voice sublime | .793 | 1267 | <.001 |
| Total_voice vital | .797 | 1267 | <.001 |
| Total_voice uneasy | .880 | 1267 | <.001 |
| Brown noise sublime | .805 | 1267 | <.001 |
| Brown noise vital | .660 | 1267 | <.001 |
| Brown noise uneasy | .863 | 1267 | <.001 |
| Pink noise sublime | .731 | 1267 | <.001 |
| Pink noise vital | .735 | 1267 | <.001 |
| Pink noise uneasy | .879 | 1267 | <.001 |
| White noise sublime | .566 | 1267 | <.001 |
| White noise vital | .637 | 1267 | <.001 |
| White noise uneasy | .837 | 1267 | <.001 |
